# Supplementary material for: The Source Areas and Migratory Pathways of the Fall Armyworm Spodoptera frugiperda (Smith) in Sichuan Province, China
Source: MDPI journal article supplement (doi:10.3390/insects13100935), 2022-10-16
Supplement: s1 [file s1]

Table S1. The larva discovery date and estimated migration date of *Spodoptera frugiperda* in Sichuan Province in 2020.

| Time  | Regions          | Sites                             | Latitude/°N | Longitude/°E | Larva discovery date | Estimated immigration date |
|-------|------------------|-----------------------------------|-------------|--------------|----------------------|----------------------------|
| April | Southern Sichuan | Gulin County, Luzhou City         | 27.9792     | 105.9265     | 4.30                 | 4.16-4.18                  |
|       | Western Sichuan  | Hanyuan County, Ya'an City        | 29.3502     | 102.6586     | 5.13                 | 4.28-4.30                  |
|       | Central Sichuan  | Gaoping District, Nanchong City   | 30.7853     | 106.1296     | 5.7                  | 4.23-4.25                  |
|       | Eastern Sichuan  | Dachuan District, Dazhou City     | 31.1960     | 107.5397     | 4.29                 | 4.15-4.17                  |
| May   | Southern Sichuan | Fushun County, Zigong City        | 29.1474     | 105.0132     | 5.21                 | 5.7-5.9                    |
|       | Western Sichuan  | Shimian County, Ya'an City        | 29.2290     | 102.2836     | 6.1                  | 5.18-5.20                  |
|       |                  | Emeishan City                     | 29.5037     | 103.3841     | 6.4                  | 5.21-5.23                  |
|       | Central Sichuan  | Yingshan County, Nanchong City    | 31.1587     | 106.7094     | 5.27                 | 5.13-5.15                  |
|       | Eastern Sichuan  | Enyang District, Bazhong City     | 31.8276     | 106.5896     | 5.20                 | 5.6-5.8                    |
|       |                  | Yuechi County, Guang'an City      | 30.5334     | 106.4117     | 6.4                  | 5.21-5.23                  |
| June  | Southern Sichuan | Gongxian county, Yibin City       | 28.1921     | 104.7959     | 6.22                 | 6.8-6.10                   |
|       | Western Sichuan  | Jintang County, Chengdu City      | 30.7231     | 104.6074     | 6.28                 | 6.14-6.16                  |
|       | Central Sichuan  | Shehong City                      | 30.8662     | 105.3331     | 6.19                 | 6.5-6.7                    |
|       |                  | Dongxing District, Neijiang City  | 29.6181     | 105.0638     | 6.25                 | 6.11-6.13                  |
|       | Northern Sichuan | Lizhou District, Guangyuan City   | 32.4319     | 105.9404     | 6.18                 | 6.4-6.6                    |
|       |                  | Chaotian District, Guangyuan City | 32.6427     | 105.9202     | 6.29                 | 6.15-6.17                  |

Table S2 The larva discovery date and estimated migration date of *Spodoptera frugiperda* in Sichuan Province in 2021

| Time  | Regions              | Sites                                    | Latitude/°N | Longitude/°E | Larva discovery date | Estimated immigration date |
|-------|----------------------|------------------------------------------|-------------|--------------|----------------------|----------------------------|
| April | Southwestern Sichuan | Xichang City, Liangshan Prefecture       | 27.9006     | 102.2715     | 4.12                 | 4.3-4.5                    |
|       |                      | Huili County, Liangshan Prefecture       | 26.6570     | 102.2082     | 4.21                 | 4.12-4.14                  |
|       |                      | Leibo County, Liangshan Prefecture       | 28.2690     | 103.5784     | 4.23                 | 4.16-4.18                  |
|       | Southern Sichuan     | Xuyong County, Luzhou City               | 28.1618     | 105.4512     | 4.23                 | 4.14-4.16                  |
| May   | Southwestern Sichuan | Yanyuan County, Liangshan Prefecture     | 27.4282     | 101.5154     | 5.11                 | 5.4-5.6                    |
|       |                      | Meigu County, Liangshan Prefecture       | 28.3340     | 103.1386     | 5.18                 | 5.14-5.15                  |
|       |                      | Mianning County, Liangshan Prefecture    | 28.5553     | 102.1836     | 5.31                 | 5.24-5.26                  |
|       | Southern Sichuan     | Gaoxian County, Yibin City               | 28.4425     | 104.5244     | 5.18                 | 5.8-5.10                   |
|       | Western Sichuan      | Mabian Yi Autonomous County, Leshan City | 28.8417     | 103.5525     | 5.17                 | 5.13-5.14                  |
|       |                      | Shimian County, Ya'an City               | 29.3502     | 102.6586     | 6.4                  | 5.26-5.28                  |
|       | Eastern Sichuan      | Dazhu County, Dazhou City                | 30.7421     | 107.2116     | 5.7                  | 5.3-5.4                    |
|       |                      | Dachuan District, Dazhou City            | 31.2024     | 107.5184     | 5.19                 | 5.12-5.14                  |
| June  | Southwestern Sichuan | Dechang County, Liangshan Prefecture     | 27.4085     | 102.1826     | 6.7                  | 6.1-6.2                    |
|       |                      | Zhaojue County, Liangshan Prefecture     | 28.0205     | 102.8494     | 6.22                 | 6.15-6.17                  |
|       | Southern Sichuan     | Weiyuan County, Neijiang City            | 29.5336     | 104.6745     | 6.11                 | 6.6-6.7                    |
|       |                      | Rongxian County, Zigong City             | 29.4510     | 104.4239     | 6.16                 | 6.7-6.9                    |
|       |                      | Luxian County, Luzhou City               | 29.1578     | 105.3883     | 6.25                 | 6.14-6.16                  |
|       | Western Sichuan      | Jintang County, Chengdu                  | 30.8684     | 104.4184     | 7.6                  | 6.29-6.30                  |
|       | Central Sichuan      | Nanbu County, Nanchong City              | 31.3537     | 106.0436     | 6.16                 | 6.11-6.12                  |
|       |                      | Pengxi County, Suining City              | 30.7638     | 105.7134     | 6.24                 | 6.15-6.17                  |
|       | Northern Sichuan     | Lizhou District, Guangyuan City          | 32.4402     | 105.8524     | 6.17                 | 6.10-6.12                  |
|       |                      | Jiange County, Guangyuan City            | 32.2935     | 105.5316     | 7.7                  | 6.28-6.30                  |
